# Supplementary material for: Traumatic Meniscal Tears Are Associated With Meniscal Degeneration
Source: PubMed Central journal article supplement — Am J Sports Med. 2020 Jul 14;48(10):2345–52. doi: 10.1177/0363546520934766 (PMC7401187; doi:10.1177/0363546520934766), 2020-07-14
Supplement: DS_10.1177_0363546520934766.pdf [file DS_10.1177_0363546520934766.pdf]

**Appendix Table A1**  
Histopathologic scoring system by Pauli et al.

The range of possible total scores is 0–18. This total score can be converted to a grade as follows: G1=0–4, G2=5–9, G3=10–14, G4=15–18. Grade 1 represents normal tissue, Grade 2 is mild degeneration, Grade 3 is moderate and Grade 4 is severe degeneration.

| <b>I SURFACE including lamellar layer:</b>                        |                                                                                                                  | <b>Score</b> |
|-------------------------------------------------------------------|------------------------------------------------------------------------------------------------------------------|--------------|
| <b>I-I FEMORAL SIDE:</b>                                          |                                                                                                                  |              |
|                                                                   | A Smooth                                                                                                         | 0            |
|                                                                   | B Slight fibrillation or slightly undulating                                                                     | 1            |
|                                                                   | C Moderate fibrillation or markedly undulating                                                                   | 2            |
|                                                                   | D Severe fibrillation or disruption                                                                              | 3            |
| <b>I-II TIBIAL SIDE:</b>                                          |                                                                                                                  |              |
|                                                                   | A Smooth                                                                                                         | 0            |
|                                                                   | B Slight fibrillation or slightly undulating                                                                     | 1            |
|                                                                   | C Moderate fibrillation or markedly undulating                                                                   | 2            |
|                                                                   | D Severe fibrillation or disruption                                                                              | 3            |
| <b>I-III INNER BORDER:</b>                                        |                                                                                                                  |              |
|                                                                   | A Smooth                                                                                                         | 0            |
|                                                                   | B Slight fibrillation or slightly undulating                                                                     | 1            |
|                                                                   | C Moderate fibrillation or markedly undulating                                                                   | 2            |
|                                                                   | D Severe fibrillation or disruption                                                                              | 3            |
| <b>II CELLULARITY</b>                                             |                                                                                                                  |              |
|                                                                   | A Normal                                                                                                         | 0            |
|                                                                   | B Diffuse hypercellularity                                                                                       | 1            |
|                                                                   | C Diffuse hypo/acellular regions                                                                                 | 2            |
|                                                                   | D Hypocellularity (empty lacuna, pyknotic cells)                                                                 | 3            |
| <b>III COLLAGEN ORGANIZATION/ALIGNMENT AND FIBER ORGANIZATION</b> |                                                                                                                  |              |
|                                                                   | A Collagen fibers organized, homogenous eosinophilic staining of extracellular matrix                            | 0            |
|                                                                   | B Collagen fibers organized, diffuse foci of hyaline or mucinous degeneration                                    | 1            |
|                                                                   | C Collagen fibers unorganized, confluent foci or bands of hyaline or mucinous degeneration, fraying              | 2            |
|                                                                   | D Collagen fibers unorganized, fibrocartilaginous separation (edema, cystic formation), severe fraying and tears | 3            |
| <b>IV MATRIX STAINING (SAFRANIN O - FAST GREEN)</b>               |                                                                                                                  |              |
|                                                                   | A None                                                                                                           | 0            |
|                                                                   | B Slight                                                                                                         | 1            |
|                                                                   | C Moderate                                                                                                       | 2            |
|                                                                   | D Strong                                                                                                         | 3            |
